# Supplementary material for: A new strategy to engineer polymer bulk heterojunction solar cells with thick active layers via self-assembly of the tertiary columnar phase
Source: Royal Society of Chemistry journal article supplement (doi:10.1039/c7nr03789a), 2017-01-01
Supplement: c7nr03789a1.pdf [file c7nr03789a1.pdf]

## Supplementary information

### A new strategy to engineer polymer bulk heterojunction solar cells with thick active layers via self-assembly of columnar phase

Hongfei Li,<sup>a</sup> Zhenhua Yang,<sup>a</sup> Cheng Pan,<sup>a</sup> Naisheng Jiang,<sup>a</sup> Sushil K. Satija,<sup>b</sup> Di Xu,<sup>a</sup> Dilip Gersappe,<sup>a</sup> Chang-Yong Nam,<sup>\*c</sup> and Miriam H. Rafailovich <sup>\*a</sup>

<sup>a</sup>Department of Materials Science and Engineering, Stony Brook University, Stony Brook, New York 11794, United States

<sup>b</sup>Center for Neutron Research, National Institute of Standards and Technology, Gaithersburg, Maryland 20899, United States.

<sup>c</sup>Center for Functional Nanomaterials, Brookhaven National Laboratory, Upton, New York 11973, United States

\*E-mail: [miriam.rafailovich@stonybrook.edu](mailto:miriam.rafailovich@stonybrook.edu) (M.H.R.), [cynam@bnl.gov](mailto:cynam@bnl.gov) (C.-Y.N)

### PCBM Weight Percentage Calculation

The weight fraction of PCBM ( $\Phi$ ) along the perimeter of the PMMA columns was calculated by using the

following equation: 
$$\Phi = \frac{V_c \rho_c}{V_t \rho_t}$$
, where  $V_c$  is the volume of cylindrical shell of PCBM along the PMMA columns,  $\rho_c$  is the density of PCBM,  $V_t$  is the volume of active layer,  $\rho_t$  is the concentration of PCBM in the blend. We assume the PCBM aggregation layer along the PMMA columns as a cylindrical shell:  $V_c = 2\pi r h \Delta r$ , where  $r$  is the column radius,  $h$  is the height of the cylindrical shell,  $\Delta r$  is the interfacial width of PCBM aggregation layer.

### Domain Size Calculation by Scherrer Equation

The domain size of crystalline phase (e.g., P3HT, PCBM) can be calculated by the Scherrer equation using the full width at half maximum of a corresponding X-ray scattering peak: 
$$d = \frac{0.9\lambda}{\beta \cos \theta}$$
, where  $d$  is the size of crystalline domain,  $\lambda$  is the X-ray wavelength,  $\beta$  is the full width at half maximum of a diffraction peak, and  $\theta$  is the peak position.

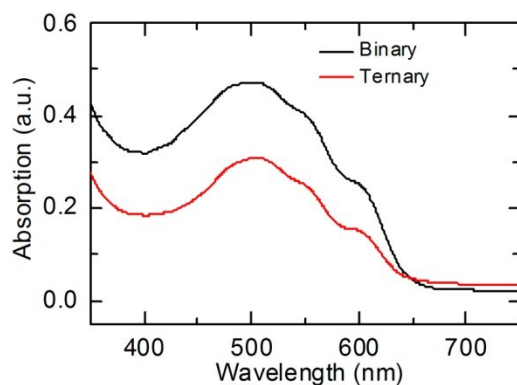

**Fig. S1.** Ultraviolet-visible light absorption spectra of  $\sim 210$  nm thick thin film samples after thermal annealing at  $150$  °C for 1 hr in  $\sim 10$  mTorr vacuum: P3HT:PMMA:PCBM ternary blend (red line); P3HT:PCBM binary blend (black line). The integrated absorption of the ternary blend in the measurement range is  $\sim 60\%$  of that for the binary blend, which is consistent with the geometric volume fraction of photoactive P3HT:PCBM in the ternary blend sample.

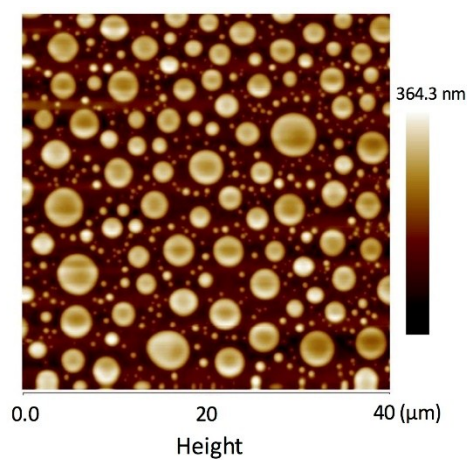

**Fig. S2.** Topographical AFM image of P3HT:PMMA:PCBM ternary BHJ blend thin film (1:1:1 wt. ratio, spin-cast on the PEDOT:PSS-coated ITO substrate, annealed at  $150$  °C for 1 hr in  $\sim 10$  mTorr vacuum) *with top Al contact*. The scan size is  $40 \mu\text{m} \times 40 \mu\text{m}$ .

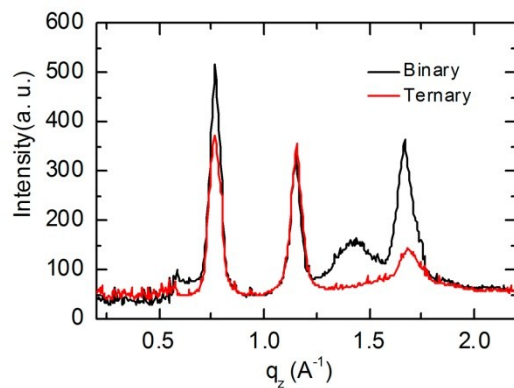

**Fig. S3.** Linear X-ray scattering intensity profile along the  $q_z$  axis obtained from the two-dimensional GIWAXS data measured from the binary P3HT:PCBM and ternary P3HT:PMMA:PCBM blend thin films prepared on Si. The films were annealed at 150 °C for 4 hr in  $\sim 10$  mTorr vacuum before the measurement.

|                                  |    |                 |     |     |
|----------------------------------|----|-----------------|-----|-----|
| Thin Film Thickness ( $\sigma$ ) | 43 | NNN             | NNN | NNN |
|                                  | 39 | YNN             | YNN | YNN |
|                                  | 35 | YYY             | NNN | YNN |
|                                  | 31 | YYY             | YYY | YNN |
|                                  | 27 | YYY             | YYY | YYY |
|                                  |    | 0.5             | 0.7 | 0.9 |
|                                  |    | $\epsilon_{AB}$ |     |     |

**Fig. S4.** Summary of percolating column structure formation for different simulation parameter settings. Three simulations were conducted for each combination of film thickness and  $\epsilon$ . Y and N, respectively, denote the cases when percolating column structure is observed and not observed.

**Table S1. Ternary blend solar cell photovoltaic parameters at different blend layer thicknesses**

| Thickness (nm) | V <sub>OC</sub> (V) | J <sub>SC</sub> (mA/cm <sup>2</sup> ) | FF          | PCE           |
|----------------|---------------------|---------------------------------------|-------------|---------------|
| 560.2 ± 2.55   | 0.615 ± 0.01        | 7.7247 ± 1.21                         | 52.4 ± 0.8% | 2.488 ± 0.56% |
| 486.4 ± 2.35   | 0.625 ± 0.005       | 8.9235 ± 1.40                         | 53.2 ± 1.1% | 2.968 ± 0.57% |
| 298.8 ± 1.42   | 0.625 ± 0.005       | 9.4326 ± 0.42                         | 53.3 ± 1.3% | 3.14 ± 0.25%  |
| 283.8 ± 1.14   | 0.615 ± 0.005       | 7.1042 ± 0.75                         | 55.3 ± 0.6% | 2.41 ± 0.15%  |
| 217.2 ± 0.75   | 0.615 ± 0.009       | 6.0629 ± 0.19                         | 47.5 ± 1.8% | 1.77 ± 0.12%  |
| 195.5 ± 0.64   | 0.615 ± 0.006       | 5.4106 ± 0.59                         | 47.7 ± 1.9% | 1.59 ± 0.14%  |
| 155.3 ± 0.51   | 0.615 ± 0.01        | 5.3796 ± 0.14                         | 45.3 ± 1.6% | 1.51 ± 0.13%  |

**Table S2. Binary blend solar cell photovoltaic parameters at different blend layer thicknesses**

| Thickness (nm) | V <sub>OC</sub> (V) | J <sub>SC</sub> (mA/cm <sup>2</sup> ) | FF          | PCE            |
|----------------|---------------------|---------------------------------------|-------------|----------------|
| 320.4 ± 1.78   | 0.595 ± 0.01        | 6.0622 ± 0.25                         | 53.6 ± 1.8% | 1.934 ± 0.18%  |
| 231.8 ± 1.65   | 0.575 ± 0.02        | 6.3613 ± 0.74                         | 54.3 ± 3.1% | 1.989 ± 0.42%  |
| 221.4 ± 1.37   | 0.585 ± 0.005       | 6.5416 ± 0.99                         | 54.1 ± 3.3% | 2.069 ± 0.15%  |
| 167.2 ± 1.16   | 0.605 ± 0.005       | 7.0661 ± 0.36                         | 50.1 ± 0.7% | 2.1459 ± 0.16% |
| 126.8 ± 0.55   | 0.605 ± 0.006       | 7.6671 ± 0.09                         | 51.4 ± 1.4% | 2.3860 ± 0.11% |
| 111.8 ± 0.44   | 0.605 ± 0.005       | 8.4706 ± 0.24                         | 49.4 ± 2.8% | 2.5314 ± 0.08% |
| 98.8 ± 0.31    | 0.595 ± 0.01        | 6.4094 ± 0.14                         | 51.9 ± 1.7% | 1.9791 ± 0.12% |
